# Supplementary material for: Morphology of a self-doped conducting oligomer for green energy applications
Source: Royal Society of Chemistry journal article supplement (doi:10.1039/c7nr04617k), 2017-01-01
Supplement: c7nr04617k1.pdf [file c7nr04617k1.pdf]

## Morphology of a Self-Doped Conducting Oligomer for Green Energy Applications

Juan Felipe Franco-Gonzalez,<sup>a</sup> Eleni Pavlopoulou,<sup>b</sup> Eleni Stavrinidou,<sup>a</sup> Roger Gabrielsson,<sup>a</sup>  
Daniel T. Simon,<sup>a</sup> Magnus Berggren<sup>a</sup> and Igor V. Zozoulenko<sup>a</sup>

<sup>a</sup>Laboratory of Organic Electronics, Department of Science and Technology, Linköping University, SE-601 74 Norrköping, Sweden.

<sup>b</sup> Bordeaux INP, Université de Bordeaux, CNRS, LCPO UMR 5629, 33600 Pessac, France.

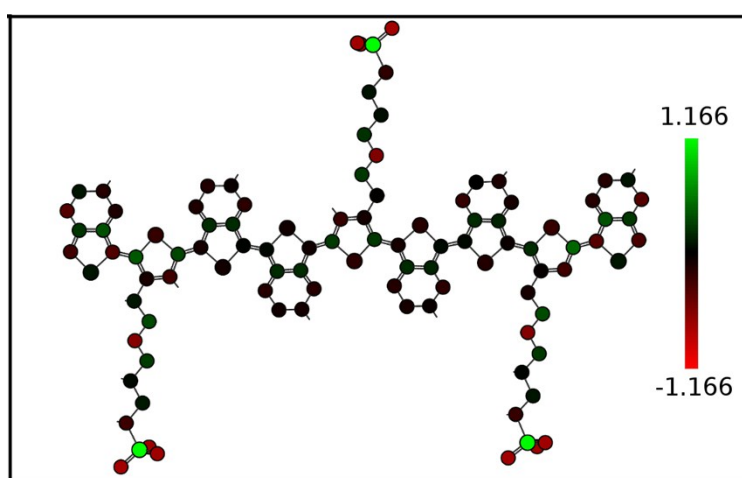

**Figures S1.** Charge distribution in a ETE-S oligomer. Color bar scales show charge in units of  $e$ . The calculations are performed within the density-functional theory (DFT) using functional WB97XD with the 6-31+g(d) basis set as implemented in Gaussian package. The partial charge per atom were taken from the fitting to electrostatic potential (ESP) population analysis as implemented in Gaussian suite.

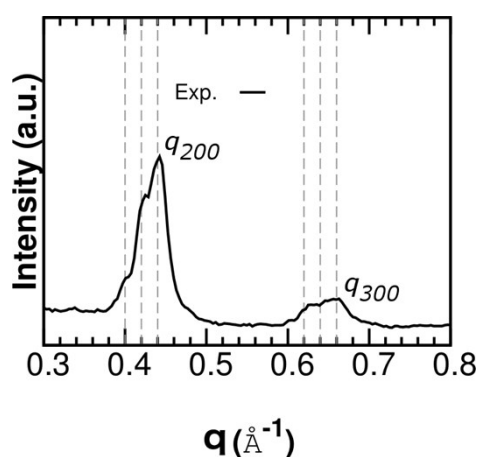

**Figures S2.** Experimental GIWAXS pattern on the oligomer film cast (the same as in Figure 2a but in an enlarged scale). A closer look shows that the 200 and 300 peaks can be deconvoluted in three peaks each, located at  $0.4 \text{ Å}^{-1}$ ,  $0.42 \text{ Å}^{-1}$  and  $0.44 \text{ Å}^{-1}$  respectively, for 200 peak; and,  $0.62 \text{ Å}^{-1}$ ,  $0.64 \text{ Å}^{-1}$  and  $0.66 \text{ Å}^{-1}$  respectively, for 300 peak. Their close vicinity and the limited resolution at the low  $q$ 's inhibit their deconvolution for the 100 peak. These could be suggestive of a slight disorder of the crystalline structure

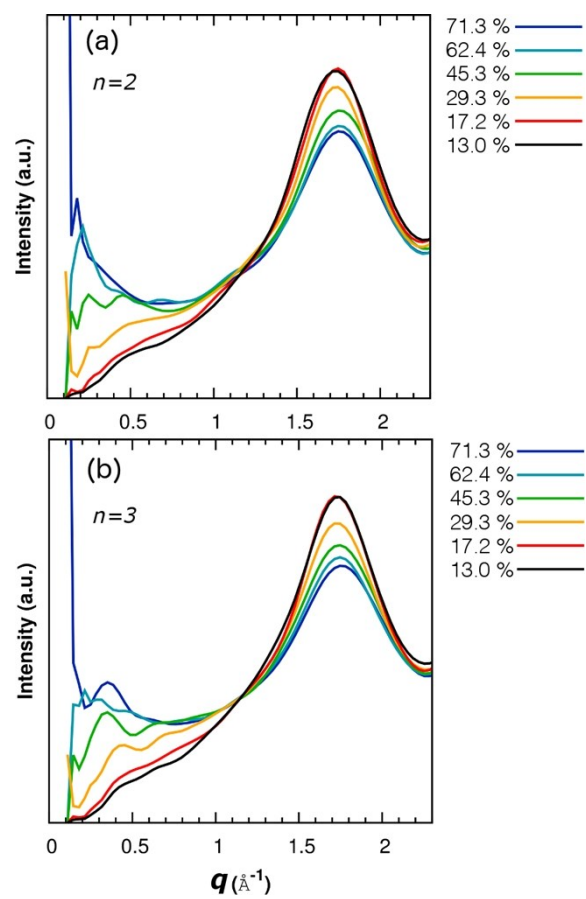

**Figure S3.** X-Ray Diffraction Patterns for the ETE-S oligomers with the chain lengths (a)  $n=2$  and (b)  $n=3$ , for different water contents.
